# Supplementary material for: Impacts of Blended Bombyx mori Silk Fibroin and Recombinant Spider Silk Fibroin Hydrogels on Cell Growth
Source: MDPI journal article supplement (doi:10.3390/polym13234182), 2021-11-29
Supplement: s1 [file s1]

## Supplementary information

**Manuscript title:** Interactions of blended *Bombyx mori* silk fibroin and recombinant spider silk fibroin hydrogels with cells

**Authors:** Chavee Laomeephol<sup>1</sup>, Apichai Vasuratna<sup>2</sup>, Juthamas Ratanavaraporn<sup>1,3,4</sup>, Sorada Kanokpanont<sup>1,3,5</sup>, Jittima Amie Luckanagul<sup>1,6</sup>, Martin Humenik<sup>7</sup>, Thomas Scheibel<sup>7\*</sup>, Siriporn Damrongsakkul<sup>1,3,5\*</sup>

**Affiliations:** <sup>1</sup>Biomaterial Engineering for Medical and Health Research Unit, Faculty of Engineering, Chulalongkorn University, Bangkok 10330, Thailand

<sup>2</sup>Department of Obstetrics and Gynecology, Faculty of Medicine, Chulalongkorn University, Bangkok 10330, Thailand

<sup>3</sup>Biomedical Engineering Research Center, Faculty of Engineering, Chulalongkorn University, Bangkok 10330, Thailand

<sup>4</sup>Biomedical Engineering Program, Faculty of Engineering, Chulalongkorn University, Bangkok 10330, Thailand

<sup>5</sup>Department of Chemical Engineering, Faculty of Engineering, Chulalongkorn University, Bangkok 10330, Thailand

<sup>6</sup>Department of Pharmaceutics and Industrial Pharmacy, Faculty of Pharmaceutical Sciences, Chulalongkorn University, Bangkok 10330, Thailand

<sup>7</sup>Department of Biomaterials, Faculty of Engineering Science, University of Bayreuth, Prof.-Rüdiger-Bormann Str.1, 95447 Bayreuth, Germany

\*Corresponding authors

Thomas Scheibel, Email: thomas.scheibel@bm.uni-bayreuth.de, Tel: +49-921-55-6700

Siriporn Damrongsakkul, Email: siriporn.d@chula.ac.th, Tel: +662-218-6862, Fax: +662-218-6877

## **Materials and Methods**

### *Surface wettability test*

Hydrophilicity of the SF:eADF4(C16) blended films was evaluated using a water contact angle tester (DSA 10-MK2, Kruss Scientific, Germany). Thin films of SF:eADF4(C16) were cast onto glass slides and allowed to dry at room temperature for 7 days. After that, water was dropped on the films and the contact angle was measured in quadruplicate. All experiments were performed in triplicate.

## **Results**

### *Surface wettability of the protein films*

Wettability of SF:eADF4(C16) films was analyzed from water contact angles. As presented in **Figure S1**, there was a slight difference between each sample, and the smallest angle was observed for eADF4(C16) films.

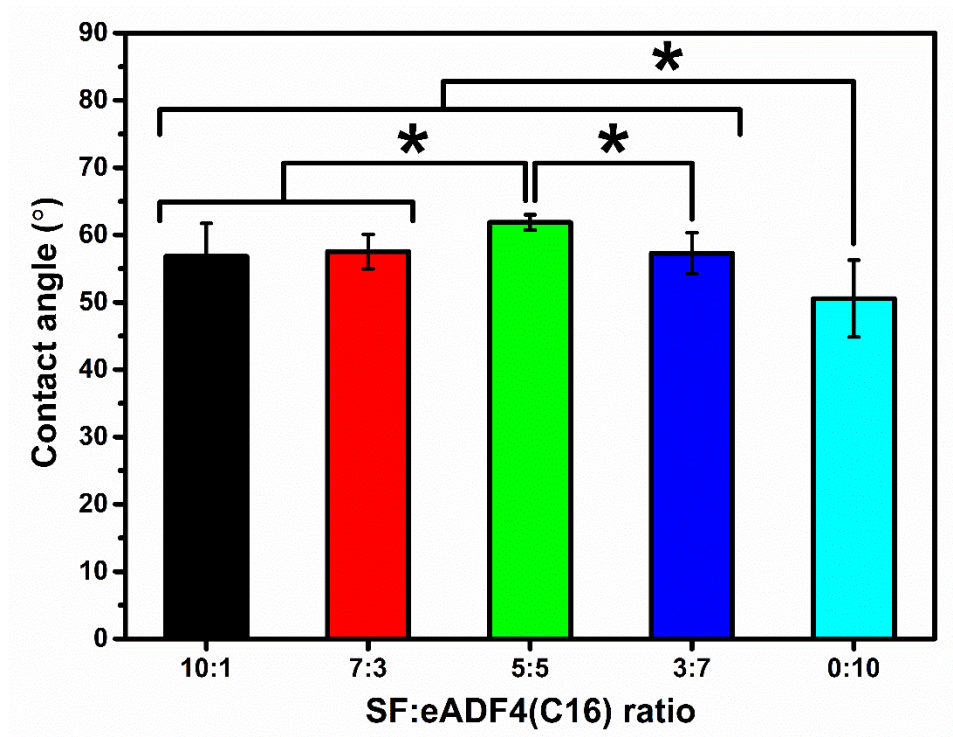

**Figure S1** Water contact angle of blend SF:eADF4(C16) films. The asterisk (\*) indicates the statistical difference at  $p\text{-value} \leq 0.05$ .
